# Supplementary material for: Spatiotemporal patterns of the fossil-fuel CO 2 signal in central Europe: results from a high-resolution atmospheric transport model
Source: Copernicus journal article supplement (doi:10.5194/acp-17-14145-2017), 2017-11-28
Supplement: Supplementary file 1 [file acp-17-14145-2017-supplement.zip]

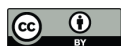

## *Supplement of*

# **Spatiotemporal patterns of the fossil-fuel CO<sub>2</sub> signal in central Europe: results from a high-resolution atmospheric transport model**

**Yu Liu et al.**

*Correspondence to:* Nicolas Gruber ([nicolas.gruber@env.ethz.ch](mailto:nicolas.gruber@env.ethz.ch))

- [acp-17-14145-2017-supplement-title-page.pdf](#)
- [acp\\_yu\\_liu\\_24nov17\\_supplementary](#)
  - [.DS\\_Store](#)
  - [Supplementary\\_liu\\_2017.pdf](#)
  - [emission\\_time\\_profiles\\_liu\\_2017.xlsx](#)
  - [mapping\\_unfccc\\_carbocount\\_to\\_snap\\_liu\\_2017.xlsx](#)
  - [emission\\_time\\_profiles.xlsx](#)

The copyright of individual parts of the supplement might differ from the CC BY 3.0 License.
