# Supplementary material for: Spatiotemporal patterns of the fossil-fuel CO 2 signal in central Europe: results from a high-resolution atmospheric transport model
Source: Copernicus journal article supplement (doi:10.5194/acp-17-14145-2017), 2017-11-28
Supplement: Supplementary file 2 [file acp-17-14145-2017-supplement.zip]

The supplementary material section contains the following elements:

- i. A figure showing the topography of the model domain (Figure S1)
- ii. A table containing a list of all the tracers employed in our modeling study (Table S1)
- iii. A table listing the performance of the model against a set of observation sites when using afternoon data only (Table S2). This table can be contrasted with table 1 in the main text, where the performance is assessed using data from all times of the day.
- iv. An Excel Spreadsheet named *emission\_time\_profiles\_liu\_2017.xls* that provides the hourly, daily, and weekly time profiles for the emissions for each country and for each emission category.
- v. An Excel Spreadsheet named *mapping\_unfccc\_carbocount\_to\_snap\_liu\_2017.xlsx* that provides the mapping of the SNAP codes to the emission categories we employ in our study here. See main text for details and source.

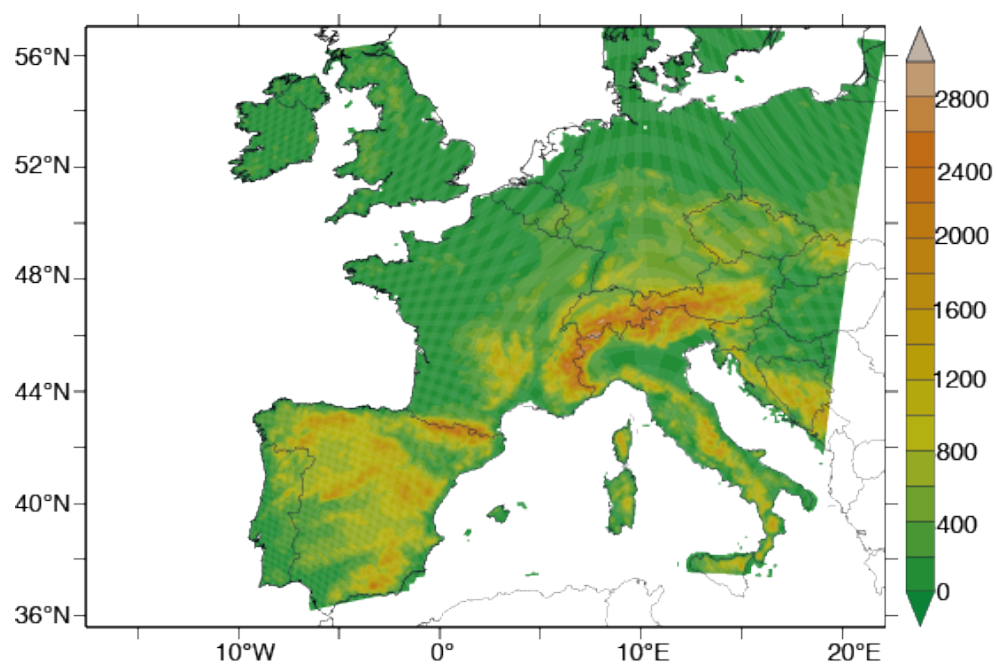

Figure S1. Topography of the model domain of COSMO, unit: m.

Table S1. List of the fossil fuel tracers used in our COSMO simulations. Listed is also whether this tracers used a constant or time-varying time function (see (2) in main text).

| Name        | Description                                                                  | Time function |
|-------------|------------------------------------------------------------------------------|---------------|
| CO2_C_tot   | Tracer of total emissions                                                    | constant      |
| CO2_C_he    | Tracer of emissions from heating                                             | constant      |
| CO2_C_in    | Tracer of emissions from industry                                            | constant      |
| CO2_C_pp    | Tracer of emissions from power plants                                        | constant      |
| CO2_C_ro    | Tracer of emissions from road transport                                      | constant      |
| CO2_C_re    | Tracer of emissions from other sources                                       | constant      |
| CO2_p_tot   | Tracer from total emissions                                                  | Time varying  |
| CO2_p_CH    | Tracer of emissions from Switzerland                                         | Time varying  |
| CO2_p_GE    | Tracer of emissions from Germany                                             | Time varying  |
| CO2_p_FR    | Tracer of emissions from France                                              | Time varying  |
| CO2_p_IT    | Tracer of emissions from Italy                                               | Time varying  |
| CO2_p_AU    | Tracer of emissions from Austria                                             | Time varying  |
| CO2_p_NL    | Tracer of emissions from the Netherlands and Belgium                         | Time varying  |
| CO2_p_UK    | Tracer of emissions from the United Kingdom                                  | Time varying  |
| CO2_p_SW    | Tracer of emissions from southwestern countries (Spain and Portugal)         | Time varying  |
| CO2_p_EA    | Tracer of emissions from eastern European countries                          | Time varying  |
| CO2_p_other | Tracer of emissions from other regions (e.g. maritime emissions by shipping) | Time varying  |

Table S2. Evaluation of COSMO-7 based simulations of the atmospheric CO<sub>2</sub> concentration at 4 European sites. The comparison (observations minus model) are computed using afternoon average (from 12:00-18:00 PM) for the period March 27, 2008 through March 26, 2009.

| Station                   | characteristics | height above ground (m) | S.T.D. obs (ppm) | S.T.D. mod(ppm) | Correlation | Bias (ppm) |
|---------------------------|-----------------|-------------------------|------------------|-----------------|-------------|------------|
| Cabauw (CBW, Netherlands) | tower           | 20                      | 11.46            | 11.80           | 0.78        | -0.72      |
| Cabauw (CBW, Netherlands) | tower           | 60                      | 10.86            | 11.06           | 0.77        | -0.27      |
| Cabauw (CBW, Netherlands) | tower           | 200                     | 9.35             | 8.19            | 0.74        | -0.88      |
| Puy de Dome (PUY, France) | mountain top    | 10                      | 7.83             | 7.65            | 0.75        | -0.85      |
| Hegyhatsal (HUN, Hungary) | continental     | 10                      | 12.08            | 9.42            | 0.8         | -4.0       |
| Hegyhatsal (HUN, Hungary) | continental     | 48                      | 11.51            | 9.32            | 0.8         | -4.04      |
| Hegyhatsal (HUN, Hungary) | continental     | 115                     | 10.69            | 8.72            | 0.8         | -3.86      |
| Mace Head, (MHD, Ireland) | coastal         | 15                      | 6.26             | 3.87            | 0.81        | 0.34       |
